# Supplementary material
Source: PubMed Central journal article supplement (PMC7941450)
Supplement: CNR2-2-e1169-s001.pdf [file CNR2-2-e1169-s001.pdf]

## Supporting Information

### Comparison of Prostate Specific Membrane Antigen Ligands in Clinical Translation Research for Diagnosis of Prostate Cancer

S. Sengupta<sup>a</sup>, M. Asha Krishnan<sup>b</sup>, S. Chattopadhyay<sup>b-d\*</sup>, V. Chelvam<sup>a,b\*</sup>

<sup>a</sup>Discipline of Chemistry, School of Basic Sciences, Indian Institute of Technology Indore, Simrol, Indore-453 552

<sup>b</sup>Discipline of Biosciences and Biomedical Engineering, School of Engineering, Simrol, Indore-453 552, Madhya Pradesh, India

<sup>c</sup>Discipline of Physics, School of Basic Sciences, Indian Institute of Technology Indore, Simrol, Indore-453 552

<sup>d</sup>Discipline of Metallurgy Engineering and Material Science, School of Engineering, Simrol, Indore-453 552, Madhya Pradesh, India

\*Correspondence: \*Dr. V. Chelvam e-mail: [cvenkat@iiti.ac.in](mailto:cvenkat@iiti.ac.in); Phone: 91-731-2438789;

\*Dr. S. Chattopadhyay email: [sudeshna@iiti.ac.in](mailto:sudeshna@iiti.ac.in); Phone: 91-7324-306544; Mr. S.

Sengupta email: [phd12123109@iiti.ac.in](mailto:phd12123109@iiti.ac.in); Ms. M. Asha Krishnan

email: [phd1401171003@iiti.ac.in](mailto:phd1401171003@iiti.ac.in)

**THE AMERICAN PHYSIOLOGICAL SOCIETY LICENSE  
TERMS AND CONDITIONS**

Dec 30, 2014

---

This is a License Agreement between Venkatesh Chelvam ("You") and The American Physiological Society ("The American Physiological Society") provided by Copyright Clearance Center ("CCC"). The license consists of your order details, the terms and conditions provided by The American Physiological Society, and the payment terms and conditions.

**All payments must be made in full to CCC. For payment instructions, please see information listed at the bottom of this form.**

|                                           |                                                                                                  |
|-------------------------------------------|--------------------------------------------------------------------------------------------------|
| License Number                            | 3538810353794                                                                                    |
| License date                              | Dec 30, 2014                                                                                     |
| Licensed content publisher                | The American Physiological Society                                                               |
| Licensed content publication              | Am J Physiol-Cell Physiology                                                                     |
| Licensed content title                    | Is prostate-specific membrane antigen a multifunctional protein?                                 |
| Licensed content author                   | Ayyappan K. Rajasekaran,Gopalakrishnapillai Anilkumar,Jason J. Christiansen                      |
| Licensed content date                     | Oct 19, 2014                                                                                     |
| Volume number                             | 288                                                                                              |
| Issue number                              | 5                                                                                                |
| Type of Use                               | Journal/Magazine                                                                                 |
| Requestor type                            | non-profit academic/educational                                                                  |
| Readers being charged a fee for this work | No                                                                                               |
| Format                                    | print and electronic                                                                             |
| Portion                                   | figures/tables/images                                                                            |
| Number of figures/tables /images          | 1                                                                                                |
| Will you be translating?                  | no                                                                                               |
| World Rights                              | no                                                                                               |
| Order reference number                    | None                                                                                             |
| Title of the article                      | Early detection and diagnosis of prostate cancer by targeting prostate specific membrane antigen |
| Publication the new article is in         | British Journal of Cancer                                                                        |
| Publisher of the article                  | Nature Publishing Group                                                                          |
| Author of new article                     | S. Sengupta, S. Chattopadhyay, C. Venkatesh                                                      |
| Expected publication date                 | Mar 2015                                                                                         |
| Estimated size of the article (pages)     | 41                                                                                               |
| Billing Type                              | Invoice                                                                                          |

**Billing Address** Venkatesh Chelvam  
Indian Institute of Technology Indore  
DAVV-IET Campus  
  
Indore, India 452017  
Attn: Venkatesh Chelvam

**End Client Company Name** Indian Institute of Technology Indore

**End Client Contact Name** Dr. Chelvam Venkatesh

**End Client Telephone** 917312438765

**End Client Email Address** cvenkat@iiti.ac.in

**Total** 50.00 USD

**Terms and Conditions**

Terms and Conditions:

©The American Physiological Society (APS). All rights reserved. The publisher for this requested copyrighted material is APS. By clicking “accept” in connection with completing this license transaction, you agree to the following terms and conditions that apply to this transaction. At the time you opened your Rightslink account you had agreed to the billing and payment terms and conditions established by Copyright Clearance Center (CCC) available at <http://myaccount.copyright.com>

The APS hereby grants to you a nonexclusive limited license to reuse published material as requested by you, provided you have disclosed complete and accurate details of your proposed reuse of articles, figures, tables, images, and /or data in new or derivative works. Licenses are for a one-time English language use with a maximum distribution equal to the number of copies identified by you in the licensing process, unless additional options for translations or World Rights were included in your request. Any form of print or electronic republication must be completed within three years from the date hereof. Copies prepared before then may be distributed thereafter

The following conditions are required for a License of Reuse:

**Attribution:** You must publish in your new or derivative work a citation to the original source of the material(s) being licensed herein, including publication name, author(s), volume, year, and page number prominently displayed in the article or within the figure/image legend.

**Abstracts:** APS Journal article abstracts may be reproduced or translated for noncommercial purposes without requesting permission, provided the citation to the original source of the materials is included as noted above (“Attribution”). Abstracts or portions of abstracts may not be used in advertisements or commercial promotions.

**Non-profit/noncommercial reuse:** APS grants permission for the free reuse of APS published material in new works published for educational purposes, provided there is no charge or fee for the new work and/or the work is not directly or indirectly commercially supported or sponsored. Neither original authors nor non-authors may reuse published material in new works that are commercially supported or sponsored including reuse in a work produced by a commercial publisher without seeking permission.

**Video and photographs:** Some material published in APS publications may belong to other copyright holders and cannot be republished without their permission. The copyright holder of photographs must be ascertained from the original source by the permission requestor.

Videos and podcasts may not be rebroadcast without proper attribution and permission as requested here. For further inquiries on reuse of these types of materials, please contact [cvillemez@the-aps.org](mailto:cvillemez@the-aps.org)

Figures/Tables/Images are available to the requestor from the APS journals website at <http://www.the-aps.org/publications/journals/>. The obtaining of content is a separate transaction and does not involve Rightslink or CCC, and is the responsibility of the permission seeker. Higher resolution images are available at additional charge from APS; please contact [cvillemez@the-aps.org](mailto:cvillemez@the-aps.org)

Original Authors of Published Works: To see a full list of original authors rights concerning their own published work <http://www.the-aps.org/publications/authorinfo/copyright.htm>

Content reuse rights awarded by the APS may be exercised immediately upon issuance of this license, provided full disclosure and complete and accurate details of the proposed reuse have been made; no license is finally granted unless and until full payment is received either by the publisher or by CCC as provided in CCC's Billing and Payment Terms and Conditions. If full payment is not received on a timely basis, then any license preliminarily granted shall be deemed automatically revoked and shall be void as if never granted. Further, in the event that you breach any of these Terms and Conditions or any of CCC's Billing and Payment Terms and Conditions, the license is automatically revoked and shall be void as if never granted. Use of materials as described in a revoked license, as well as any use of the materials beyond the scope of the license, may constitute copyright infringement and the Publisher reserves the right to take action to protect its copyright of its materials.

The APS makes no representations or warranties with respect to the licensed material. You hereby indemnify and agree to hold harmless the publisher and CCC, and their respective officers, directors, employees and agents, from and against any and all claims arising out of your use of the licensed material other than as specifically authorized pursuant to this license.

This license is personal to you /your organization and may not be sublicensed, assigned, or transferred by you /your organization to another person /organization without the publisher's permission. This license may not be amended except in writing signed by both parties, or in the case of the publisher, by CCC on the publisher's behalf.

The APS reserves all rights not specifically granted in the combination of (i) the license details provided by you and accepted in the course of this licensing transaction, (ii) these Terms and Conditions and (iii) CCC's Billing and Payment Terms and Conditions.

v1.0

**You will be invoiced within 48 hours of this transaction date. You may pay your invoice by credit card upon receipt of the invoice for this transaction. Please follow instructions provided at that time.**

**To pay for this transaction now; please remit a copy of this document along with your payment. Payment should be in the form of a check or money order referencing your account number and this invoice number RLNK501491346.**

**Make payments to "COPYRIGHT CLEARANCE CENTER" and send to:**

**Copyright Clearance Center  
Dept 001  
P.O. Box 843006  
Boston, MA 02284-3006**

**Please disregard electronic and mailed copies if you remit payment in advance**

Questions? [customercare@copyright.com](mailto:customercare@copyright.com) or +1-855-239-3415 (toll free in the US) or +1-978-646-2777.

Gratis licenses (referencing \$0 in the Total field) are free. Please retain this printable license for your reference. No payment is required.

---

---

**JOHN WILEY AND SONS LICENSE  
TERMS AND CONDITIONS**

Dec 30, 2014

---

---

This Agreement between Venkatesh Chelvam ("You") and John Wiley and Sons ("John Wiley and Sons") consists of your license details and the terms and conditions provided by John Wiley and Sons and Copyright Clearance Center.

|                                                                                            |                                                                                                                                      |
|--------------------------------------------------------------------------------------------|--------------------------------------------------------------------------------------------------------------------------------------|
| License Number                                                                             | 3538821043362                                                                                                                        |
| License date                                                                               | Dec 30, 2014                                                                                                                         |
| Licensed Content Publisher                                                                 | John Wiley and Sons                                                                                                                  |
| Licensed Content Publication                                                               | The EMBO Journal                                                                                                                     |
| Licensed Content Title                                                                     | Structure of glutamate carboxypeptidase II, a drug target in neuronal damage and prostate cancer                                     |
| Licensed Content Author                                                                    | Jeroen R Mesters, Cyril Barinka, Weixing Li, Takashi Tsukamoto, Pavel Majer, Barbara S Slusher, Jan Konvalinka, Rolf Hilgenfeld      |
| Licensed Content Date                                                                      | Feb 9, 2006                                                                                                                          |
| Pages                                                                                      | 10                                                                                                                                   |
| Type of use                                                                                | Journal/Magazine                                                                                                                     |
| Requestor type                                                                             | University/Academic                                                                                                                  |
| Is the reuse sponsored by or associated with a pharmaceutical or medical products company? | no                                                                                                                                   |
| Format                                                                                     | Print and electronic                                                                                                                 |
| Portion                                                                                    | Figure/table                                                                                                                         |
| Number of figures/tables                                                                   | 1                                                                                                                                    |
| Original Wiley figure/table number(s)                                                      | figure 1                                                                                                                             |
| Will you be translating?                                                                   | No                                                                                                                                   |
| Title of new article                                                                       | Early detection and diagnosis of prostate cancer by targeting prostate specific membrane antigen                                     |
| Publication the new article is in                                                          | British Journal of Cancer                                                                                                            |
| Publisher of new article                                                                   | Nature Publishing Group                                                                                                              |
| None                                                                                       |                                                                                                                                      |
| Author of new article                                                                      | S. Sengupta, S. Chattopadhyay, C. Venkatesh                                                                                          |
| Expected publication date of new article                                                   | Mar 2015                                                                                                                             |
| Estimated size of new article (pages)                                                      | 41                                                                                                                                   |
| Requestor Location                                                                         | Venkatesh Chelvam<br>Indian Institute of Technology Indore<br>DAVV-IET Campus<br><br>Indore, India 452017<br>Attn: Venkatesh Chelvam |

|                      |                                                                                                                                      |
|----------------------|--------------------------------------------------------------------------------------------------------------------------------------|
| Billing Type         | Invoice                                                                                                                              |
| Billing Address      | Venkatesh Chelvam<br>Indian Institute of Technology Indore<br>DAVV-IET Campus<br><br>Indore, India 452017<br>Attn: Venkatesh Chelvam |
| Total                | 0.00 USD                                                                                                                             |
| Terms and Conditions |                                                                                                                                      |

## TERMS AND CONDITIONS

This copyrighted material is owned by or exclusively licensed to John Wiley & Sons, Inc. or one of its group companies (each a "Wiley Company") or handled on behalf of a society with which a Wiley Company has exclusive publishing rights in relation to a particular work (collectively "WILEY"). By clicking  accept  in connection with completing this licensing transaction, you agree that the following terms and conditions apply to this transaction (along with the billing and payment terms and conditions established by the Copyright Clearance Center Inc., ("CCC's Billing and Payment terms and conditions"), at the time that you opened your Rightslink account (these are available at any time at <http://myaccount.copyright.com>).

### Terms and Conditions

- The materials you have requested permission to reproduce or reuse (the "Wiley Materials") are protected by copyright.
- You are hereby granted a personal, non-exclusive, non-sub licensable (on a stand-alone basis), non-transferable, worldwide, limited license to reproduce the Wiley Materials for the purpose specified in the licensing process. This license is for a one-time use only and limited to any maximum distribution number specified in the license. The first instance of republication or reuse granted by this licence must be completed within two years of the date of the grant of this licence (although copies prepared before the end date may be distributed thereafter). The Wiley Materials shall not be used in any other manner or for any other purpose, beyond what is granted in the license. Permission is granted subject to an appropriate acknowledgement given to the author, title of the material/book/journal and the publisher. You shall also duplicate the copyright notice that appears in the Wiley publication in your use of the Wiley Material. Permission is also granted on the understanding that nowhere in the text is a previously published source acknowledged for all or part of this Wiley Material. Any third party content is expressly excluded from this permission.
- With respect to the Wiley Materials, all rights are reserved. Except as expressly granted by the terms of the license, no part of the Wiley Materials may be copied, modified, adapted (except for minor reformatting required by the new Publication), translated, reproduced, transferred or distributed, in any form or by any means, and no derivative works may be made based on the Wiley Materials without the prior permission of the respective copyright owner. You may not alter, remove or suppress in any manner any copyright, trademark or other notices displayed by the Wiley Materials. You may not license, rent, sell, loan, lease, pledge, offer as security, transfer

or assign the Wiley Materials on a stand-alone basis, or any of the rights granted to you hereunder to any other person.

- The Wiley Materials and all of the intellectual property rights therein shall at all times remain the exclusive property of John Wiley & Sons Inc, the Wiley Companies, or their respective licensors, and your interest therein is only that of having possession of and the right to reproduce the Wiley Materials pursuant to Section 2 herein during the continuance of this Agreement. You agree that you own no right, title or interest in or to the Wiley Materials or any of the intellectual property rights therein. You shall have no rights hereunder other than the license as provided for above in Section 2. No right, license or interest to any trademark, trade name, service mark or other branding ("Marks") of WILEY or its licensors is granted hereunder, and you agree that you shall not assert any such right, license or interest with respect thereto.
- NEITHER WILEY NOR ITS LICENSORS MAKES ANY WARRANTY OR REPRESENTATION OF ANY KIND TO YOU OR ANY THIRD PARTY, EXPRESS, IMPLIED OR STATUTORY, WITH RESPECT TO THE MATERIALS OR THE ACCURACY OF ANY INFORMATION CONTAINED IN THE MATERIALS, INCLUDING, WITHOUT LIMITATION, ANY IMPLIED WARRANTY OF MERCHANTABILITY, ACCURACY, SATISFACTORY QUALITY, FITNESS FOR A PARTICULAR PURPOSE, USABILITY, INTEGRATION OR NON-INFRINGEMENT AND ALL SUCH WARRANTIES ARE HEREBY EXCLUDED BY WILEY AND ITS LICENSORS AND WAIVED BY YOU
- WILEY shall have the right to terminate this Agreement immediately upon breach of this Agreement by you.
- You shall indemnify, defend and hold harmless WILEY, its Licensors and their respective directors, officers, agents and employees, from and against any actual or threatened claims, demands, causes of action or proceedings arising from any breach of this Agreement by you.
- IN NO EVENT SHALL WILEY OR ITS LICENSORS BE LIABLE TO YOU OR ANY OTHER PARTY OR ANY OTHER PERSON OR ENTITY FOR ANY SPECIAL, CONSEQUENTIAL, INCIDENTAL, INDIRECT, EXEMPLARY OR PUNITIVE DAMAGES, HOWEVER CAUSED, ARISING OUT OF OR IN CONNECTION WITH THE DOWNLOADING, PROVISIONING, VIEWING OR USE OF THE MATERIALS REGARDLESS OF THE FORM OF ACTION, WHETHER FOR BREACH OF CONTRACT, BREACH OF WARRANTY, TORT, NEGLIGENCE, INFRINGEMENT OR OTHERWISE (INCLUDING, WITHOUT LIMITATION, DAMAGES BASED ON LOSS OF PROFITS, DATA, FILES, USE, BUSINESS OPPORTUNITY OR CLAIMS OF THIRD PARTIES), AND WHETHER OR NOT THE PARTY HAS BEEN ADVISED OF THE POSSIBILITY OF SUCH DAMAGES. THIS LIMITATION SHALL APPLY NOTWITHSTANDING ANY FAILURE OF ESSENTIAL PURPOSE OF ANY LIMITED REMEDY PROVIDED HEREIN.
- Should any provision of this Agreement be held by a court of competent jurisdiction to be illegal, invalid, or unenforceable, that provision shall be deemed amended to achieve as nearly as possible the same economic effect as the original provision, and



the legality, validity and enforceability of the remaining provisions of this Agreement shall not be affected or impaired thereby.

- The failure of either party to enforce any term or condition of this Agreement shall not constitute a waiver of either party's right to enforce each and every term and condition of this Agreement. No breach under this agreement shall be deemed waived or excused by either party unless such waiver or consent is in writing signed by the party granting such waiver or consent. The waiver by or consent of a party to a breach of any provision of this Agreement shall not operate or be construed as a waiver of or consent to any other or subsequent breach by such other party.
- This Agreement may not be assigned (including by operation of law or otherwise) by you without WILEY's prior written consent.
- Any fee required for this permission shall be non-refundable after thirty (30) days from receipt by the CCC.
- These terms and conditions together with CCC's Billing and Payment terms and conditions (which are incorporated herein) form the entire agreement between you and WILEY concerning this licensing transaction and (in the absence of fraud) supersedes all prior agreements and representations of the parties, oral or written. This Agreement may not be amended except in writing signed by both parties. This Agreement shall be binding upon and inure to the benefit of the parties' successors, legal representatives, and authorized assigns.
- In the event of any conflict between your obligations established by these terms and conditions and those established by CCC's Billing and Payment terms and conditions, these terms and conditions shall prevail.
- WILEY expressly reserves all rights not specifically granted in the combination of (i) the license details provided by you and accepted in the course of this licensing transaction, (ii) these terms and conditions and (iii) CCC's Billing and Payment terms and conditions.
- This Agreement will be void if the Type of Use, Format, Circulation, or Requestor Type was misrepresented during the licensing process.
- This Agreement shall be governed by and construed in accordance with the laws of the State of New York, USA, without regards to such state's conflict of law rules. Any legal action, suit or proceeding arising out of or relating to these Terms and Conditions or the breach thereof shall be instituted in a court of competent jurisdiction in New York County in the State of New York in the United States of America and each party hereby consents and submits to the personal jurisdiction of such court, waives any objection to venue in such court and consents to service of process by registered or certified mail, return receipt requested, at the last known address of such party.

## WILEY OPEN ACCESS TERMS AND CONDITIONS

Wiley Publishes Open Access Articles in fully Open Access Journals and in Subscription journals offering Online Open. Although most of the fully Open Access journals publish open access articles under the terms of the Creative Commons Attribution (CC BY) License only, the subscription journals and a few of the Open Access Journals offer a choice of Creative Commons Licenses: Creative Commons Attribution (CC-BY) license [Creative Commons Attribution Non-Commercial \(CC-BY-NC\) license](#) and [Creative Commons Attribution Non-Commercial-NoDerivs \(CC-BY-NC-ND\) License](#). The license type is clearly identified on the article.

Copyright in any research article in a journal published as Open Access under a Creative Commons License is retained by the author(s). Authors grant Wiley a license to publish the article and identify itself as the original publisher. Authors also grant any third party the right to use the article freely as long as its integrity is maintained and its original authors, citation details and publisher are identified as follows: [Title of Article/Author/Journal Title and Volume/Issue. Copyright (c) [year] [copyright owner as specified in the Journal]. Links to the final article on Wiley's website are encouraged where applicable.

### **The Creative Commons Attribution License**

The [Creative Commons Attribution License \(CC-BY\)](#) allows users to copy, distribute and transmit an article, adapt the article and make commercial use of the article. The CC-BY license permits commercial and non-commercial re-use of an open access article, as long as the author is properly attributed.

The Creative Commons Attribution License does not affect the moral rights of authors, including without limitation the right not to have their work subjected to derogatory treatment. It also does not affect any other rights held by authors or third parties in the article, including without limitation the rights of privacy and publicity. Use of the article must not assert or imply, whether implicitly or explicitly, any connection with, endorsement or sponsorship of such use by the author, publisher or any other party associated with the article.

For any reuse or distribution, users must include the copyright notice and make clear to others that the article is made available under a Creative Commons Attribution license, linking to the relevant Creative Commons web page.

To the fullest extent permitted by applicable law, the article is made available as is and without representation or warranties of any kind whether express, implied, statutory or otherwise and including, without limitation, warranties of title, merchantability, fitness for a particular purpose, non-infringement, absence of defects, accuracy, or the presence or absence of errors.

### **Creative Commons Attribution Non-Commercial License**

The [Creative Commons Attribution Non-Commercial \(CC-BY-NC\) License](#) permits use, distribution and reproduction in any medium, provided the original work is properly cited and is not used for commercial purposes.(see below)

### **Creative Commons Attribution-Non-Commercial-NoDerivs License**

The [Creative Commons Attribution Non-Commercial-NoDerivs License](#) (CC-BY-NC-ND) permits use, distribution and reproduction in any medium, provided the original work is

properly cited, is not used for commercial purposes and no modifications or adaptations are made. (see below)

### Use by non-commercial users

For non-commercial and non-promotional purposes, individual users may access, download, copy, display and redistribute to colleagues Wiley Open Access articles, as well as adapt, translate, text- and data-mine the content subject to the following conditions:

- The authors' moral rights are not compromised. These rights include the right of "paternity" (also known as "attribution" - the right for the author to be identified as such) and "integrity" (the right for the author not to have the work altered in such a way that the author's reputation or integrity may be impugned).
- Where content in the article is identified as belonging to a third party, it is the obligation of the user to ensure that any reuse complies with the copyright policies of the owner of that content.
- If article content is copied, downloaded or otherwise reused for non-commercial research and education purposes, a link to the appropriate bibliographic citation (authors, journal, article title, volume, issue, page numbers, DOI and the link to the definitive published version on **Wiley Online Library**) should be maintained. Copyright notices and disclaimers must not be deleted.
- Any translations, for which a prior translation agreement with Wiley has not been agreed, must prominently display the statement: "This is an unofficial translation of an article that appeared in a Wiley publication. The publisher has not endorsed this translation."

### Use by commercial "for-profit" organisations

Use of Wiley Open Access articles for commercial, promotional, or marketing purposes requires further explicit permission from Wiley and will be subject to a fee. Commercial purposes include:

- Copying or downloading of articles, or linking to such articles for further redistribution, sale or licensing;
- Copying, downloading or posting by a site or service that incorporates advertising with such content;
- The inclusion or incorporation of article content in other works or services (other than normal quotations with an appropriate citation) that is then available for sale or licensing, for a fee (for example, a compilation produced for marketing purposes, inclusion in a sales pack)
- Use of article content (other than normal quotations with appropriate citation) by for-profit organisations for promotional purposes
- Linking to article content in e-mails redistributed for promotional, marketing or educational purposes;

- Use for the purposes of monetary reward by means of sale, resale, licence, loan, transfer or other form of commercial exploitation such as marketing products
- Print reprints of Wiley Open Access articles can be purchased from:  
[corporatesales@wiley.com](mailto:corporatesales@wiley.com)

Further details can be found on Wiley Online Library <http://olabout.wiley.com/WileyCDA/Section/id-410895.html>

Other Terms and Conditions:

### **v1.9**

Questions? [customercare@copyright.com](mailto:customercare@copyright.com) or +1-855-239-3415 (toll free in the US) or +1-978-646-2777.

Gratis licenses (referencing \$0 in the Total field) are free. Please retain this printable license for your reference. No payment is required.

---

---

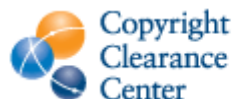

# RightsLink®

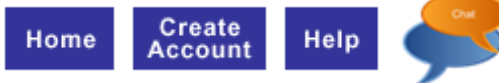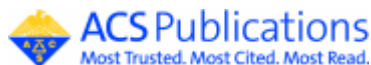

**Title:** Design, Synthesis, and Preclinical Evaluation of Prostate-Specific Membrane Antigen Targeted 99mTc-Radioimaging Agents

**Author:** Sumith A. Kularatne, Zhigang Zhou, Jun Yang, et al

**Publication:** Molecular Pharmaceutics

**Publisher:** American Chemical Society

**Date:** Jun 1, 2009

Copyright © 2009, American Chemical Society

**LOGIN**

If you're a [copyright.com user](#), you can login to RightsLink using your copyright.com credentials. Already a [RightsLink user](#) or want to [learn more?](#)

## PERMISSION/LICENSE IS GRANTED FOR YOUR ORDER AT NO CHARGE

This type of permission/license, instead of the standard Terms & Conditions, is sent to you because no fee is being charged for your order. Please note the following:

- Permission is granted for your request in both print and electronic formats, and translations.
- If figures and/or tables were requested, they may be adapted or used in part.
- Please print this page for your records and send a copy of it to your publisher/graduate school.
- Appropriate credit for the requested material should be given as follows: "Reprinted (adapted) with permission from (COMPLETE REFERENCE CITATION). Copyright (YEAR) American Chemical Society." Insert appropriate information in place of the capitalized words.
- One-time permission is granted only for the use specified in your request. No additional uses are granted (such as derivative works or other editions). For any other uses, please submit a new request.

If credit is given to another source for the material you requested, permission must be obtained from that source.

BACK

CLOSE WINDOW

Copyright © 2018 [Copyright Clearance Center, Inc.](#) All Rights Reserved. [Privacy statement.](#) [Terms and Conditions.](#)  
Comments? We would like to hear from you. E-mail us at [customercare@copyright.com](mailto:customercare@copyright.com)



# RightsLink®



**Title:** 68Ga-Labeled Inhibitors of Prostate-Specific Membrane Antigen (PSMA) for Imaging Prostate Cancer

**Author:** Sangeeta Ray Banerjee, Mrudula Pullambhatla, Youngjoo Byun, et al

**Publication:** Journal of Medicinal Chemistry

**Publisher:** American Chemical Society

**Date:** Jul 1, 2010

Copyright © 2010, American Chemical Society

**LOGIN**

If you're a **copyright.com user**, you can login to RightsLink using your copyright.com credentials. Already a **RightsLink user** or want to [learn more?](#)

## PERMISSION/LICENSE IS GRANTED FOR YOUR ORDER AT NO CHARGE

This type of permission/license, instead of the standard Terms & Conditions, is sent to you because no fee is being charged for your order. Please note the following:

- Permission is granted for your request in both print and electronic formats, and translations.
- If figures and/or tables were requested, they may be adapted or used in part.
- Please print this page for your records and send a copy of it to your publisher/graduate school.
- Appropriate credit for the requested material should be given as follows: "Reprinted (adapted) with permission from (COMPLETE REFERENCE CITATION). Copyright (YEAR) American Chemical Society." Insert appropriate information in place of the capitalized words.
- One-time permission is granted only for the use specified in your request. No additional uses are granted (such as derivative works or other editions). For any other uses, please submit a new request.

If credit is given to another source for the material you requested, permission must be obtained from that source.

BACK

CLOSE WINDOW

Copyright © 2018 [Copyright Clearance Center, Inc.](#) All Rights Reserved. [Privacy statement.](#) [Terms and Conditions.](#)  
Comments? We would like to hear from you. E-mail us at [customercare@copyright.com](mailto:customercare@copyright.com)



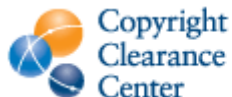

# RightsLink®

**SPRINGER NATURE**

**Title:** Comparison of PET imaging with a 68Ga-labelled PSMA ligand and 18F-choline-based PET/CT for the diagnosis of recurrent prostate cancer

**Author:** Ali Afshar-Oromieh, Christian M. Zechmann, Anna Malcher et al

**Publication:** European Journal of Nuclear Medicine

**Publisher:** Springer Nature

**Date:** Jan 1, 2013

Copyright © 2013, The Author(s)

## Creative Commons

This is an open access article distributed under the terms of the [Creative Commons CC BY](#) license, which permits unrestricted use, distribution, and reproduction in any medium, provided the original work is properly cited.

You are not required to obtain permission to reuse this article.

To order reprints of this content, please contact Springer Nature by e-mail at [reprintswarehouse@springernature.com](mailto:reprintswarehouse@springernature.com), and you will be contacted very shortly with a quote.



# RightsLink®

[Home](#)
[Account Info](#)
[Help](#)
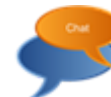

**Title:** PET imaging with a [68Ga]gallium-labelled PSMA ligand for the diagnosis of prostate cancer: biodistribution in humans and first evaluation of tumour lesions

**Author:** A. Afshar-Oromieh, A. Malcher, M. Eder et al

**Publication:** European Journal of Nuclear Medicine

**Publisher:** Springer Nature

**Date:** Jan 1, 2012

Copyright © 2012, Springer-Verlag Berlin Heidelberg

Logged in as:  
Sagnik Sengupta  
Indian Institute of Technology  
Indore

[LOGOUT](#)

## Order Completed

Thank you for your order.

This Agreement between Indian Institute of Technology Indore -- Sagnik Sengupta ("You") and Springer Nature ("Springer Nature") consists of your license details and the terms and conditions provided by Springer Nature and Copyright Clearance Center.

Your confirmation email will contain your order number for future reference.

### [printable details](#)

|                              |                                                                                                                                                              |
|------------------------------|--------------------------------------------------------------------------------------------------------------------------------------------------------------|
| License Number               | 4462340823851                                                                                                                                                |
| License date                 | Nov 05, 2018                                                                                                                                                 |
| Licensed Content Publisher   | Springer Nature                                                                                                                                              |
| Licensed Content Publication | European Journal of Nuclear Medicine                                                                                                                         |
| Licensed Content Title       | PET imaging with a [68Ga]gallium-labelled PSMA ligand for the diagnosis of prostate cancer: biodistribution in humans and first evaluation of tumour lesions |
| Licensed Content Author      | A. Afshar-Oromieh, A. Malcher, M. Eder et al                                                                                                                 |
| Licensed Content Date        | Jan 1, 2012                                                                                                                                                  |
| Licensed Content Volume      | 40                                                                                                                                                           |
| Licensed Content Issue       | 4                                                                                                                                                            |
| Type of Use                  | Journal/Magazine                                                                                                                                             |

|                                        |                                                                                                                                                                                                                |
|----------------------------------------|----------------------------------------------------------------------------------------------------------------------------------------------------------------------------------------------------------------|
| Requestor type                         | non-commercial (non-profit)                                                                                                                                                                                    |
| Format                                 | print and electronic                                                                                                                                                                                           |
| Portion                                | figures/tables/illustrations                                                                                                                                                                                   |
| Number of figures/tables/illustrations | 1                                                                                                                                                                                                              |
| Will you be translating?               | no                                                                                                                                                                                                             |
| Circulation/distribution               | <501                                                                                                                                                                                                           |
| Author of this Springer Nature content | no                                                                                                                                                                                                             |
| Title of new article                   | Comparison of Prostate Specific Membrane Antigen Ligands in Clinical Translation Research for Diagnosis of Prostate Cancer                                                                                     |
| Lead author                            | Venkatesh Chelvam                                                                                                                                                                                              |
| Title of targeted journal              | Cancer Reports                                                                                                                                                                                                 |
| Publisher                              | Wiley                                                                                                                                                                                                          |
| Expected publication date              | Jan 2019                                                                                                                                                                                                       |
| Portions                               | Fig. 2                                                                                                                                                                                                         |
| Requestor Location                     | Indian Institute of Technology Indore<br>Discipline of Chemistry,<br>Indian Institute of Technology Indore,<br>Simrol<br>Indore, Madhya Pradesh 453552<br>India<br>Attn: Indian Institute of Technology Indore |
| Billing Type                           | Invoice                                                                                                                                                                                                        |
| Billing address                        | Indian Institute of Technology Indore<br>Discipline of Chemistry,<br>Indian Institute of Technology Indore,<br>Simrol<br>Indore, India 453552<br>Attn: Indian Institute of Technology Indore                   |
| Total                                  | 0.00 USD                                                                                                                                                                                                       |

[ORDER MORE](#)[CLOSE WINDOW](#)

Copyright © 2018 [Copyright Clearance Center, Inc.](#) All Rights Reserved. [Privacy statement.](#) [Terms and Conditions.](#)  
Comments? We would like to hear from you. E-mail us at [customercare@copyright.com](mailto:customercare@copyright.com)

## JNM Permission

### Non-Commercial

*JNM* allows reuse of excerpted original material, such as abstracts, short text excerpts, figures, and tables, provided appropriate credit is given to the copyright holder and the material is not used for commercial purposes. Non-commercial uses include articles in peer-review journals, classroom/teaching material, and academic theses/dissertations. Full article reprints require explicit permission with exceptions as noted below. For bulk reprints, see [our reprint page](#).

Suggested credit line: This research was originally published in *JNM*. Author(s). Title. J Nucl Med. Year;vol:pp-pp. © SNMMI.

If used in a web-only publication (e.g, a web page), a link to the original article should be provided. Materials published in another medium that are additionally posted to the web should include a link if appropriate.

This reuse license applies only to original material published in *JNM*. SNMMI does not hold copyright to reprinted material credited to other sources. Copyright to material published by presenters at SNMMI Annual Meetings is retained by the original authors.

### Commercial

To reprint *JNM* material for commercial use (textbooks by for-profit publishers, corporate marketing material, etc.), a written request is required for permission. Requests should be submitted through the online form:

### Online Application Form for Permissions

Requests can also be e-mailed, mailed or faxed to:

Permission Requests  
Communications Department  
Society of Nuclear Medicine and Molecular Imaging  
1850 Samuel Morse Drive  
Reston, VA 20190  
Fax: 703-708-9018  
E-mail: [permissions@snmmi.org](mailto:permissions@snmmi.org)

Written requests should include the same information requested in the online form. Questions can be submitted by email or phone 703-708-9000 x 1235. For bulk reprints, see [our reprint page](#).

## Press/Media Inquiries

Please refer to the [SNMMI directory](#) and search for "Press Inquiries" to find the current point of contact.

## Immediate Open Access

Articles noted as "Immediate Open Access" are licensed under [Creative Commons Attribution 4.0 International License \(CC BY\)](#), which allows users to share original work as long as appropriate credit is given to the copyright holder, including for commercial purposes. Immediate Open Access articles are noted as such in the footer of the article.

Suggested credit line: This research was originally published in *JNM*. Author(s). Title. *J Nucl Med*. Year;vol:pp-pp. © SNMMI.

This reuse license applies only to original figures and tables published in *JNM*. SNMMI does not hold copyright to reprinted material credited to other sources.

## SNMMI Annual Meeting Abstracts

Copyright for abstracts, posters, presentations, and other materials presented at SNMMI Annual Meetings is held by SNMMI for the duration of that year's meeting, but reverts to the original authors following its conclusion. SNMMI retains a license to publish those abstracts in *JNM*, but copyright remains with the original authors.

## Author's Permission to Reprint

JNM authors retain the following nonexclusive, usage rights, to be exercised only after the article has been published in final format in the print version of *JNM*.

- (a) Reprint the article in print collections of the author's own writing.
- (b) Present the article orally in its entirety.
- (c) Use the article in theses and/or dissertations.
- (d) Reproduce the article for use in courses the author is teaching. (If the author is employed by an academic institution, that institution may also reproduce the article for course teaching.)
- (e) Distribute photocopies of the article to colleagues, but only for noncommercial purposes.
- (f) Reuse original figures and tables in future works created by the author, including commercial works.
- (g) Post a copy of the article on the author's personal website, departmental website, and/or the university/institutional repository, provided a hyperlink to the article on the JNM website is included.

(h) In all the instances under clauses a through g above, the author will give proper credit to the original publication in JNM as follows:

This research was originally published in JNM. Author(s). Title. J Nucl Med. Year;vol:pp-pp. © SNMMI.

(i) Deposit a copy of the final, peer-reviewed manuscript to PubMed Central (PMC) to meet requirements of public funding. For information regarding automatic deposits to PubMed of publicly funded research, refer to the Authors page.

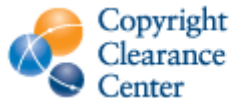

# RightsLink®

[Home](#)
[Account Info](#)
[Help](#)
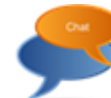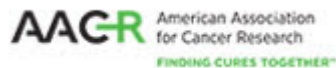

**Title:** 2-(3-{1-Carboxy-5-[(6-[<sup>18</sup>F]Fluoro-Pyridine-3-Carbonyl)-Amino]-Pentyl}-Ureido)-Pentanedioic Acid, [<sup>18</sup>F]DCFPyL, a PSMA-Based PET Imaging Agent for Prostate Cancer

Logged in as:  
Sagnik Sengupta  
Indian Institute of Technology  
Indore

Account #:  
3001360994

[LOGOUT](#)

**Author:** Ying Chen, Mrudula Pullambhatla, Catherine A. Foss, Youngjoo Byun, Sridhar Nimmagadda, Srinivasan Senthamizhchelvan, George Sgouros, Ronnie C. Mease, Martin G. Pomper

**Publication:** Clinical Cancer Research

**Publisher:** American Association for Cancer Research

**Date:** 2011-12-15

Copyright © 2011, American Association for Cancer Research

## Review Order

Please review the order details and the associated [terms and conditions](#).

|                              |                                                                                                                                                                                            |
|------------------------------|--------------------------------------------------------------------------------------------------------------------------------------------------------------------------------------------|
| Licensed Content Publisher   | American Association for Cancer Research                                                                                                                                                   |
| Licensed Content Publication | Clinical Cancer Research                                                                                                                                                                   |
| Licensed Content Title       | 2-(3-{1-Carboxy-5-[(6-[ <sup>18</sup> F]Fluoro-Pyridine-3-Carbonyl)-Amino]-Pentyl}-Ureido)-Pentanedioic Acid, [ <sup>18</sup> F]DCFPyL, a PSMA-Based PET Imaging Agent for Prostate Cancer |
| Licensed Content Author      | Ying Chen, Mrudula Pullambhatla, Catherine A. Foss, Youngjoo Byun, Sridhar Nimmagadda, Srinivasan Senthamizhchelvan, George Sgouros, Ronnie C. Mease, Martin G. Pomper                     |
| Licensed Content Date        | 2011-12-15                                                                                                                                                                                 |
| Licensed Content Volume      | 17                                                                                                                                                                                         |
| Licensed Content Issue       | 24                                                                                                                                                                                         |
| Type of Use                  | Journal/Magazine                                                                                                                                                                           |
| Requestor type               | publisher                                                                                                                                                                                  |

|                                        |                                                                                                                                                                                                                |
|----------------------------------------|----------------------------------------------------------------------------------------------------------------------------------------------------------------------------------------------------------------|
| Format                                 | print and electronic                                                                                                                                                                                           |
| Portion                                | figures/tables/illustrations                                                                                                                                                                                   |
| Number of figures/tables/illustrations | 1                                                                                                                                                                                                              |
| Will you be translating?               | no                                                                                                                                                                                                             |
| Circulation                            | 1                                                                                                                                                                                                              |
| Territory of distribution              | Worldwide                                                                                                                                                                                                      |
| Title of the article                   | Comparison of Prostate Specific Membrane Antigen Ligands in Clinical Translation Research for Diagnosis of Prostate Cancer                                                                                     |
| Publication the new article is in      | Cancer Reports                                                                                                                                                                                                 |
| Author of new article                  | Venkatesh Chelvam                                                                                                                                                                                              |
| Publisher of the article               | Wiley                                                                                                                                                                                                          |
| Expected publication date              | Jan 2019                                                                                                                                                                                                       |
| Estimated size of the article (pages)  | 1                                                                                                                                                                                                              |
| Requestor Location                     | Indian Institute of Technology Indore<br>Discipline of Chemistry,<br>Indian Institute of Technology Indore,<br>Simrol<br>Indore, Madhya Pradesh 453552<br>India<br>Attn: Indian Institute of Technology Indore |
| Total                                  | 600.00 USD                                                                                                                                                                                                     |

[Edit Order Details](#)

[Edit Requestor Location](#) This location may be used to determine your tax liability.

- I agree to these [terms and conditions](#).
- I understand this license is for reuse only and that no content is provided.

|                                                  |              |
|--------------------------------------------------|--------------|
| Customer Code (if supplied) <input type="text"/> | <b>APPLY</b> |
|--------------------------------------------------|--------------|

[BACK](#)[DECLINE](#)[CHOOSE PAYMENT](#)

Copyright © 2018 [Copyright Clearance Center, Inc.](#) All Rights Reserved. [Privacy statement](#). [Terms and Conditions](#).  
Comments? We would like to hear from you. E-mail us at [customercare@copyright.com](mailto:customercare@copyright.com)





# RightsLink®

[Home](#)
[Account Info](#)
[Help](#)
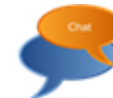

**Title:** Initial Evaluation of [18F]DCFPyL for Prostate-Specific Membrane Antigen (PSMA)-Targeted PET Imaging of Prostate Cancer

**Author:** Zsolt Szabo, Esther Mena, Steven P. Rowe et al

**Publication:** Molecular Imaging and Biology

**Publisher:** Springer Nature

**Date:** Jan 1, 2015

Copyright © 2015, World Molecular Imaging Society

Logged in as:

Sagnik Sengupta  
Indian Institute of Technology  
Indore

Account #:  
3001360994

[LOGOUT](#)

## Order Completed

Thank you for your order.

This Agreement between Indian Institute of Technology Indore -- Sagnik Sengupta ("You") and Springer Nature ("Springer Nature") consists of your license details and the terms and conditions provided by Springer Nature and Copyright Clearance Center.

Your confirmation email will contain your order number for future reference.

### [printable details](#)

|                              |                                                                                                                         |
|------------------------------|-------------------------------------------------------------------------------------------------------------------------|
| License Number               | 4462851258249                                                                                                           |
| License date                 | Nov 05, 2018                                                                                                            |
| Licensed Content Publisher   | Springer Nature                                                                                                         |
| Licensed Content Publication | Molecular Imaging and Biology                                                                                           |
| Licensed Content Title       | Initial Evaluation of [18F]DCFPyL for Prostate-Specific Membrane Antigen (PSMA)-Targeted PET Imaging of Prostate Cancer |
| Licensed Content Author      | Zsolt Szabo, Esther Mena, Steven P. Rowe et al                                                                          |
| Licensed Content Date        | Jan 1, 2015                                                                                                             |
| Licensed Content Volume      | 17                                                                                                                      |
| Licensed Content Issue       | 4                                                                                                                       |
| Type of Use                  | Journal/Magazine                                                                                                        |
| Requestor type               | non-commercial (non-profit)                                                                                             |

|                                        |                                                                                                                                                                                                                |
|----------------------------------------|----------------------------------------------------------------------------------------------------------------------------------------------------------------------------------------------------------------|
| Format                                 | print and electronic                                                                                                                                                                                           |
| Portion                                | figures/tables/illustrations                                                                                                                                                                                   |
| Number of figures/tables/illustrations | 1                                                                                                                                                                                                              |
| Will you be translating?               | no                                                                                                                                                                                                             |
| Circulation/distribution               | <501                                                                                                                                                                                                           |
| Author of this Springer Nature content | no                                                                                                                                                                                                             |
| Title of new article                   | Comparison of Prostate Specific Membrane Antigen Ligands in Clinical Translation Research for Diagnosis of Prostate Cancer                                                                                     |
| Lead author                            | Venkatesh Chelvam                                                                                                                                                                                              |
| Title of targeted journal              | Cancer Reports                                                                                                                                                                                                 |
| Publisher                              | Wiley                                                                                                                                                                                                          |
| Expected publication date              | Jan 2019                                                                                                                                                                                                       |
| Portions                               | Figure 2                                                                                                                                                                                                       |
| Requestor Location                     | Indian Institute of Technology Indore<br>Discipline of Chemistry,<br>Indian Institute of Technology Indore,<br>Simrol<br>Indore, Madhya Pradesh 453552<br>India<br>Attn: Indian Institute of Technology Indore |
| Billing Type                           | Invoice                                                                                                                                                                                                        |
| Billing address                        | Indian Institute of Technology Indore<br>Discipline of Chemistry,<br>Indian Institute of Technology Indore,<br>Simrol<br>Indore, India 453552<br>Attn: Indian Institute of Technology Indore                   |
| Total                                  | 0.00 USD                                                                                                                                                                                                       |

[ORDER MORE](#)[CLOSE WINDOW](#)

Copyright © 2018 [Copyright Clearance Center, Inc.](#) All Rights Reserved. [Privacy statement.](#) [Terms and Conditions.](#)  
Comments? We would like to hear from you. E-mail us at [customercare@copyright.com](mailto:customercare@copyright.com)

Log In

Register

Cart

ACS

ACS Publications

C&amp;EN

CAS

ACS Journals

ACS eBooks

C&amp;EN Global Enterprise

Journal of  
**Medicinal Chemistry**

Search Citation Subject

Advanced Search

Enter search text / DOI

Anywhere

Search

 J. Med. Chem.
  All Publications/Website

Subscriber access provided by Indian Institute of Technology Indore

J. Med. Chem.

ACS Med. Chem. Lett.

Browse the Journal

Articles ASAP

Current Issue

Submission &amp; Review

Open Access

About the Journal

## Article

Previous Article

Next Article

Table of Contents

## 64Cu-Labeled Inhibitors of Prostate-Specific Membrane Antigen for PET Imaging of Prostate Cancer

Sangeeta Ray Banerjee<sup>†</sup>, Mrudula Pullambhatla<sup>†</sup>, Catherine A. Foss<sup>†</sup>, Sridhar Nimmagadda<sup>†</sup>, Riccardo Ferdani<sup>‡</sup>, Carolyn J. Anderson<sup>‡</sup>, Ronnie C. Mease<sup>†</sup>, and Martin G. Pomper<sup>†</sup>

<sup>†</sup>Russell H. Morgan Department of Radiology and Radiological Sciences, Johns Hopkins Medical Institutions, 1550 Orleans Street, Baltimore, Maryland 21287, United States

<sup>‡</sup>Department of Radiology, University of Pittsburgh Medical Center, Pittsburgh, Pennsylvania 15219, United States

*J. Med. Chem.*, 2014, 57 (6), pp 2657–2669

DOI: 10.1021/jm401921j

Publication Date (Web): February 17, 2014

Copyright © 2014 American Chemical Society

\*For S.R.B.: phone, 410-955-8697; fax, 410-614-3147; E-mail, [sray9@jhmi.edu](mailto:sray9@jhmi.edu); address, Johns Hopkins Medical Institutions, 1550 Orleans Street, 4M07 CRB II, Baltimore, Maryland 21231, United States., \*For M.G.P.: phone, 410-955-2789; fax, 443-817-0990; E-mail, [mpomper@jhmi.edu](mailto:mpomper@jhmi.edu); address, Johns Hopkins Medical Institutions, 1550 Orleans Street, 492 CRB II, Baltimore, Maryland 21231, United States.

ACS AuthorChoice - This is an open access article published under an ACS AuthorChoice License, which permits copying and redistribution of the article or any adaptations for non-commercial purposes.

Cite this: *J. Med. Chem.* 2014, 57, 6, 2657-2669

RIS Citation

GO

## Article Options

ACS ActiveView PDF

Hi-Res Print, Annotate, Reference QuickView

PDF (3145 KB)

PDF w/ Links (515 KB)

Full Text HTML

Abstract

Supporting Info

Figures

References

Citing Articles

Add to Favorites

Download Citation

Email a Colleague

Order Reprints

Rights & Permissions

Citation Alerts

Add to ACS ChemWorx

SCIFINDER  
A CAS SOLUTION

Sign in

Retrieve Detailed Record of this Article

Retrieve Substances Indexed for this Article

Retrieve Reactions Indexed for this Article

Retrieve All References Cited for this Article

Retrieve All References Citing this Article

Explore by:

- Author of this Article
- Any Author
- Research Topic

Banerjee, Sangeeta Ray Search

Metrics

Article Views: 2,168 Times

Received 15 December 2013  
Published online 17 February 2014  
Published in print 27 March 2014

+ More Article Metrics

## Abstract

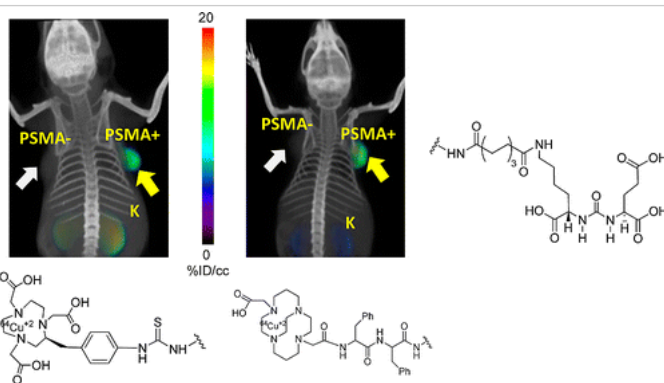

Prostate-specific membrane antigen (PSMA) is a well-recognized target for identification and therapy of a variety of cancers. Here we report five <sup>64</sup>Cu-labeled inhibitors of PSMA, [<sup>64</sup>Cu]3–7, which are based on the lysine–glutamate urea scaffold and utilize a variety of macrocyclic chelators, namely NOTA(3), PCTA(4), Oxo-DO3A(5), CB-TE2A(6), and DOTA(7), in an effort to determine which provides the most suitable pharmacokinetics for in vivo PET imaging. [<sup>64</sup>Cu]3–7 were prepared in high radiochemical yield (60–90%) and purity (>95%). Positron emission tomography (PET) imaging studies of [<sup>64</sup>Cu]3–7 revealed specific accumulation in PSMA-expressing xenografts (PSMA+ PC3 PIP) relative to isogenic control tumor (PSMA– PC3 flu) and background tissue. The favorable kinetics and high image contrast provided by CB-TE2A chelated [<sup>64</sup>Cu]6 suggest it as the most promising among the candidates tested. That could be due to the higher stability of [<sup>64</sup>Cu]CB-TE2A as compared with [<sup>64</sup>Cu]NOTA, [<sup>64</sup>Cu]PCTA, [<sup>64</sup>Cu]Oxo-DO3A, and [<sup>64</sup>Cu]DOTA chelates in vivo.

View: ACS ActiveView PDF | PDF | PDF w/ Links | Full Text HTML

Citing Articles

Related Content

Citation data is made available by participants in [Crossref's](#) Cited-by Linking service. For a more comprehensive list of citations to this article, users are encouraged to perform a search in [SciFinder](#).

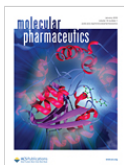

### Design and Preclinical Evaluation of an Albumin-Binding PSMA Ligand for <sup>64</sup>Cu-Based PET Imaging

Christoph A. UmbrichtMartina BenešováRoger HaslerRoger SchibliNicholas P. van der MeulenCristina Müller

*Molecular Pharmaceutics* **2018** Article ASAP

[Abstract](#) | [Full Text HTML](#) | [PDF](#) | [PDF w/ Links](#)

### High in Vivo Stability of <sup>64</sup>Cu-Labeled Cross-Bridged Chelators Is a Crucial Factor in Improved Tumor Imaging of RGD Peptide Conjugates

Swarbhanu Sarkar, Nikunj Bhatt, Yeong Su Ha, Phuong Tu Huynh, Nisarg Soni, Woonghee Lee, Yong Jin Lee, Jung Young Kim, Darpan N. Pandya, Gwang Il An, Kyo Chul Lee, Yongmin Chang, and Jeongsoo Yoo

*Journal of Medicinal Chemistry* **2018** *61* (1), 385-395

[Abstract](#) | [Full Text HTML](#) | [PDF](#) | [PDF w/ Links](#)

#### Exploring the Wild World of E-Cigarettes

Researchers are helping tackle complex issues surrounding human exposure to chemicals from the use ...

#### Meet the New Editor-in-Chief of Molecular Pharmaceutics

The American Chemical Society Division of Publications today named Professor Lynne S. Taylor, Ph.D. ...

#### Get 9 of the Latest Essential Collections of Chemistry Research

ACS Publications regularly produces Virtual Collections of the most important research topics in chemistry ...

#### Get to Know ACS Pharmacology & Translational Science at AAPS PharmSci 360

ACS Publications is excited to join the pharmaceutical sciences community at the American Association ...

#### Peiyong Hong is the 2019 Winner of the James J. Morgan ES&T Early Career Award

King Abdullah University of Science and Technology (KAUST) Professor Peiyong Hong is the recipient ...

#### Ernesto Carmona Feted as an Icon of Organometallic Chemistry

Organometallics celebrated the career of organometallic chemistry superstar Professor Ernesto Carmona of the Institute for ...

1155 Sixteenth Street N.W.  
Washington, DC 20036

京ICP备13047075

Copyright © 2018  
American Chemical Society

#### Products

[Journals A-Z](#)  
[eBooks](#)  
[C&EN](#)  
[C&EN Archives](#)  
[ACS Legacy Archives](#)  
[ACS Mobile](#)  
[Video](#)

#### User Resources

[About Us](#)  
[ACS Members](#)  
[Librarians](#)  
[ACS Publishing Center](#)  
[Website Demos](#)  
[Privacy Policy](#)  
[Mobile Site](#)

#### Support

[Get Help](#)  
[For Advertisers](#)  
[Institutional Sales](#)

[Live Chat](#)

## Partners

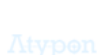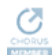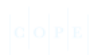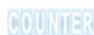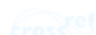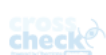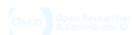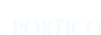

**ELSEVIER LICENSE  
TERMS AND CONDITIONS**

Oct 31, 2018

This Agreement between Ms. Mena Krishnan ("You") and Elsevier ("Elsevier") consists of your license details and the terms and conditions provided by Elsevier and Copyright Clearance Center.

|                                                 |                                                                                                                                                    |
|-------------------------------------------------|----------------------------------------------------------------------------------------------------------------------------------------------------|
| License Number                                  | 4459210521575                                                                                                                                      |
| License date                                    | Oct 31, 2018                                                                                                                                       |
| Licensed Content Publisher                      | Elsevier                                                                                                                                           |
| Licensed Content Publication                    | Biochemical and Biophysical Research Communications                                                                                                |
| Licensed Content Title                          | A low molecular weight PSMA-based fluorescent imaging agent for cancer                                                                             |
| Licensed Content Author                         | Ying Chen, Surajit Dhara, Sangeeta Ray Banerjee, Youngjoo Byun, Mrudula Pullambhatla, Ronnie C. Mease, Martin G. Pomper                            |
| Licensed Content Date                           | Dec 18, 2009                                                                                                                                       |
| Licensed Content Volume                         | 390                                                                                                                                                |
| Licensed Content Issue                          | 3                                                                                                                                                  |
| Licensed Content Pages                          | 6                                                                                                                                                  |
| Start Page                                      | 624                                                                                                                                                |
| End Page                                        | 629                                                                                                                                                |
| Type of Use                                     | reuse in a journal/magazine                                                                                                                        |
| Requestor type                                  | publisher                                                                                                                                          |
| Intended publisher of new work                  | Wiley                                                                                                                                              |
| Portion                                         | figures/tables/illustrations                                                                                                                       |
| Number of figures/tables/illustrations          | 1                                                                                                                                                  |
| Format                                          | both print and electronic                                                                                                                          |
| Are you the author of this Elsevier article?    | No                                                                                                                                                 |
| Will you be translating?                        | No                                                                                                                                                 |
| Original figure numbers                         | Figure 3                                                                                                                                           |
| Title of the article                            | Comparison of Prostate Specific Membrane Antigen Ligands for Clinical Translation in Prostate Cancer                                               |
| Publication new article is in                   | Cancer Report                                                                                                                                      |
| Publisher of the new article                    | Wiley                                                                                                                                              |
| Author of new article                           | Sagnik Sengupta                                                                                                                                    |
| Expected publication date                       | Jan 2019                                                                                                                                           |
| Estimated size of new article (number of pages) | 1                                                                                                                                                  |
| Requestor Location                              | Ms. Mena Krishnan<br>Indian Institute of Technology Indore<br>Simrol<br>Madhya Pradesh<br>Indore, other 453552<br>India<br>Attn: Ms. Mena Krishnan |

Publisher Tax ID GB 494 6272 12

Total 0.00 USD

[Terms and Conditions](#)

## INTRODUCTION

1. The publisher for this copyrighted material is Elsevier. By clicking "accept" in connection with completing this licensing transaction, you agree that the following terms and conditions apply to this transaction (along with the Billing and Payment terms and conditions established by Copyright Clearance Center, Inc. ("CCC"), at the time that you opened your Rightslink account and that are available at any time at <http://myaccount.copyright.com>).

## GENERAL TERMS

2. Elsevier hereby grants you permission to reproduce the aforementioned material subject to the terms and conditions indicated.

3. Acknowledgement: If any part of the material to be used (for example, figures) has appeared in our publication with credit or acknowledgement to another source, permission must also be sought from that source. If such permission is not obtained then that material may not be included in your publication/copies. Suitable acknowledgement to the source must be made, either as a footnote or in a reference list at the end of your publication, as follows:

"Reprinted from Publication title, Vol /edition number, Author(s), Title of article / title of chapter, Pages No., Copyright (Year), with permission from Elsevier [OR APPLICABLE SOCIETY COPYRIGHT OWNER]." Also Lancet special credit - "Reprinted from The Lancet, Vol. number, Author(s), Title of article, Pages No., Copyright (Year), with permission from Elsevier."

4. Reproduction of this material is confined to the purpose and/or media for which permission is hereby given.

5. Altering/Modifying Material: Not Permitted. However figures and illustrations may be altered/adapted minimally to serve your work. Any other abbreviations, additions, deletions and/or any other alterations shall be made only with prior written authorization of Elsevier Ltd. (Please contact Elsevier at [permissions@elsevier.com](mailto:permissions@elsevier.com)). No modifications can be made to any Lancet figures/tables and they must be reproduced in full.

6. If the permission fee for the requested use of our material is waived in this instance, please be advised that your future requests for Elsevier materials may attract a fee.

7. Reservation of Rights: Publisher reserves all rights not specifically granted in the combination of (i) the license details provided by you and accepted in the course of this licensing transaction, (ii) these terms and conditions and (iii) CCC's Billing and Payment terms and conditions.

8. License Contingent Upon Payment: While you may exercise the rights licensed immediately upon issuance of the license at the end of the licensing process for the transaction, provided that you have disclosed complete and accurate details of your proposed use, no license is finally effective unless and until full payment is received from you (either by publisher or by CCC) as provided in CCC's Billing and Payment terms and conditions. If full payment is not received on a timely basis, then any license preliminarily granted shall be deemed automatically revoked and shall be void as if never granted. Further, in the event that you breach any of these terms and conditions or any of CCC's Billing and Payment terms and conditions, the license is automatically revoked and shall be void as if never granted. Use of materials as described in a revoked license, as well as any use of the materials beyond the scope of an unrevoked license, may constitute copyright infringement and publisher reserves the right to take any and all action to protect its copyright in the materials.

9. Warranties: Publisher makes no representations or warranties with respect to the licensed material.

10. Indemnity: You hereby indemnify and agree to hold harmless publisher and CCC, and their respective officers, directors, employees and agents, from and against any and all claims arising out of your use of the licensed material other than as specifically authorized pursuant to this license.

11. **No Transfer of License:** This license is personal to you and may not be sublicensed, assigned, or transferred by you to any other person without publisher's written permission.
12. **No Amendment Except in Writing:** This license may not be amended except in a writing signed by both parties (or, in the case of publisher, by CCC on publisher's behalf).
13. **Objection to Contrary Terms:** Publisher hereby objects to any terms contained in any purchase order, acknowledgment, check endorsement or other writing prepared by you, which terms are inconsistent with these terms and conditions or CCC's Billing and Payment terms and conditions. These terms and conditions, together with CCC's Billing and Payment terms and conditions (which are incorporated herein), comprise the entire agreement between you and publisher (and CCC) concerning this licensing transaction. In the event of any conflict between your obligations established by these terms and conditions and those established by CCC's Billing and Payment terms and conditions, these terms and conditions shall control.
14. **Revocation:** Elsevier or Copyright Clearance Center may deny the permissions described in this License at their sole discretion, for any reason or no reason, with a full refund payable to you. Notice of such denial will be made using the contact information provided by you. Failure to receive such notice will not alter or invalidate the denial. In no event will Elsevier or Copyright Clearance Center be responsible or liable for any costs, expenses or damage incurred by you as a result of a denial of your permission request, other than a refund of the amount(s) paid by you to Elsevier and/or Copyright Clearance Center for denied permissions.

### LIMITED LICENSE

The following terms and conditions apply only to specific license types:

15. **Translation:** This permission is granted for non-exclusive world **English** rights only unless your license was granted for translation rights. If you licensed translation rights you may only translate this content into the languages you requested. A professional translator must perform all translations and reproduce the content word for word preserving the integrity of the article.
16. **Posting licensed content on any Website:** The following terms and conditions apply as follows: Licensing material from an Elsevier journal: All content posted to the web site must maintain the copyright information line on the bottom of each image; A hyper-text must be included to the Homepage of the journal from which you are licensing at <http://www.sciencedirect.com/science/journal/xxxxx> or the Elsevier homepage for books at <http://www.elsevier.com>; Central Storage: This license does not include permission for a scanned version of the material to be stored in a central repository such as that provided by Heron/XanEdu.
- Licensing material from an Elsevier book: A hyper-text link must be included to the Elsevier homepage at <http://www.elsevier.com> . All content posted to the web site must maintain the copyright information line on the bottom of each image.

**Posting licensed content on Electronic reserve:** In addition to the above the following clauses are applicable: The web site must be password-protected and made available only to bona fide students registered on a relevant course. This permission is granted for 1 year only. You may obtain a new license for future website posting.

17. **For journal authors:** the following clauses are applicable in addition to the above:

#### Preprints:

A preprint is an author's own write-up of research results and analysis, it has not been peer-reviewed, nor has it had any other value added to it by a publisher (such as formatting, copyright, technical enhancement etc.).

Authors can share their preprints anywhere at any time. Preprints should not be added to or enhanced in any way in order to appear more like, or to substitute for, the final versions of articles however authors can update their preprints on arXiv or RePEc with their Accepted Author Manuscript (see below).

If accepted for publication, we encourage authors to link from the preprint to their formal publication via its DOI. Millions of researchers have access to the formal publications on ScienceDirect, and so links will help users to find, access, cite and use the best available version. Please note that Cell Press, The Lancet and some society-owned have different preprint policies. Information on these policies is available on the journal homepage.

**Accepted Author Manuscripts:** An accepted author manuscript is the manuscript of an article that has been accepted for publication and which typically includes author-incorporated changes suggested during submission, peer review and editor-author communications.

Authors can share their accepted author manuscript:

- immediately
  - via their non-commercial person homepage or blog
  - by updating a preprint in arXiv or RePEc with the accepted manuscript
  - via their research institute or institutional repository for internal institutional uses or as part of an invitation-only research collaboration work-group
  - directly by providing copies to their students or to research collaborators for their personal use
  - for private scholarly sharing as part of an invitation-only work group on commercial sites with which Elsevier has an agreement
- After the embargo period
  - via non-commercial hosting platforms such as their institutional repository
  - via commercial sites with which Elsevier has an agreement

In all cases accepted manuscripts should:

- link to the formal publication via its DOI
- bear a CC-BY-NC-ND license - this is easy to do
- if aggregated with other manuscripts, for example in a repository or other site, be shared in alignment with our hosting policy not be added to or enhanced in any way to appear more like, or to substitute for, the published journal article.

**Published journal article (JPA):** A published journal article (PJA) is the definitive final record of published research that appears or will appear in the journal and embodies all value-adding publishing activities including peer review co-ordination, copy-editing, formatting, (if relevant) pagination and online enrichment.

Policies for sharing publishing journal articles differ for subscription and gold open access articles:

**Subscription Articles:** If you are an author, please share a link to your article rather than the full-text. Millions of researchers have access to the formal publications on ScienceDirect, and so links will help your users to find, access, cite, and use the best available version. Theses and dissertations which contain embedded PJAs as part of the formal submission can be posted publicly by the awarding institution with DOI links back to the formal publications on ScienceDirect.

If you are affiliated with a library that subscribes to ScienceDirect you have additional private sharing rights for others' research accessed under that agreement. This includes use for classroom teaching and internal training at the institution (including use in course packs and courseware programs), and inclusion of the article for grant funding purposes.

**Gold Open Access Articles:** May be shared according to the author-selected end-user license and should contain a [CrossMark logo](#), the end user license, and a DOI link to the formal publication on ScienceDirect.

Please refer to Elsevier's [posting policy](#) for further information.

18. **For book authors** the following clauses are applicable in addition to the above:

Authors are permitted to place a brief summary of their work online only. You are not allowed to download and post the published electronic version of your chapter, nor may you scan the printed edition to create an electronic version. **Posting to a repository:** Authors are permitted to post a summary of their chapter only in their institution's repository.

19. **Thesis/Dissertation:** If your license is for use in a thesis/dissertation your thesis may be submitted to your institution in either print or electronic form. Should your thesis be published commercially, please reapply for permission. These requirements include permission for the Library and Archives of Canada to supply single copies, on demand, of the complete thesis and include permission for Proquest/UMI to supply single copies, on demand, of the complete thesis. Should your thesis be published commercially, please



reapply for permission. Theses and dissertations which contain embedded PJAs as part of the formal submission can be posted publicly by the awarding institution with DOI links back to the formal publications on ScienceDirect.

### **Elsevier Open Access Terms and Conditions**

You can publish open access with Elsevier in hundreds of open access journals or in nearly 2000 established subscription journals that support open access publishing. Permitted third party re-use of these open access articles is defined by the author's choice of Creative Commons user license. See our [open access license policy](#) for more information.

#### **Terms & Conditions applicable to all Open Access articles published with Elsevier:**

Any reuse of the article must not represent the author as endorsing the adaptation of the article nor should the article be modified in such a way as to damage the author's honour or reputation. If any changes have been made, such changes must be clearly indicated.

The author(s) must be appropriately credited and we ask that you include the end user license and a DOI link to the formal publication on ScienceDirect.

If any part of the material to be used (for example, figures) has appeared in our publication with credit or acknowledgement to another source it is the responsibility of the user to ensure their reuse complies with the terms and conditions determined by the rights holder.

#### **Additional Terms & Conditions applicable to each Creative Commons user license:**

**CC BY:** The CC-BY license allows users to copy, to create extracts, abstracts and new works from the Article, to alter and revise the Article and to make commercial use of the Article (including reuse and/or resale of the Article by commercial entities), provided the user gives appropriate credit (with a link to the formal publication through the relevant DOI), provides a link to the license, indicates if changes were made and the licensor is not represented as endorsing the use made of the work. The full details of the license are available at <http://creativecommons.org/licenses/by/4.0>.

**CC BY NC SA:** The CC BY-NC-SA license allows users to copy, to create extracts, abstracts and new works from the Article, to alter and revise the Article, provided this is not done for commercial purposes, and that the user gives appropriate credit (with a link to the formal publication through the relevant DOI), provides a link to the license, indicates if changes were made and the licensor is not represented as endorsing the use made of the work. Further, any new works must be made available on the same conditions. The full details of the license are available at <http://creativecommons.org/licenses/by-nc-sa/4.0>.

**CC BY NC ND:** The CC BY-NC-ND license allows users to copy and distribute the Article, provided this is not done for commercial purposes and further does not permit distribution of the Article if it is changed or edited in any way, and provided the user gives appropriate credit (with a link to the formal publication through the relevant DOI), provides a link to the license, and that the licensor is not represented as endorsing the use made of the work. The full details of the license are available at <http://creativecommons.org/licenses/by-nc-nd/4.0>.

Any commercial reuse of Open Access articles published with a CC BY NC SA or CC BY NC ND license requires permission from Elsevier and will be subject to a fee.

Commercial reuse includes:

- Associating advertising with the full text of the Article
- Charging fees for document delivery or access
- Article aggregation
- Systematic distribution via e-mail lists or share buttons

Posting or linking by commercial companies for use by customers of those companies.

### **20. Other Conditions:**

v1.9

**Questions? [customer@copyright.com](mailto:customer@copyright.com) or +1-855-239-3415 (toll free in the US) or +1-978-646-2777.**





# RightsLink®

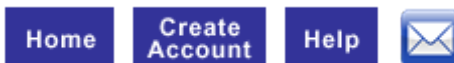

**Title:** Development of Tumor-Targeted Near Infrared Probes for Fluorescence Guided Surgery

**Author:** Lindsay E. Kelderhouse, Venkatesh Chelvam, Charity Wayua, et al

**Publication:** Bioconjugate Chemistry

**Publisher:** American Chemical Society

**Date:** Jun 1, 2013

Copyright © 2013, American Chemical Society

**LOGIN**

If you're a **copyright.com user**, you can login to RightsLink using your copyright.com credentials. Already a **RightsLink user** or want to [learn more?](#)

## PERMISSION/LICENSE IS GRANTED FOR YOUR ORDER AT NO CHARGE

This type of permission/license, instead of the standard Terms & Conditions, is sent to you because no fee is being charged for your order. Please note the following:

- Permission is granted for your request in both print and electronic formats, and translations.
- If figures and/or tables were requested, they may be adapted or used in part.
- Please print this page for your records and send a copy of it to your publisher/graduate school.
- Appropriate credit for the requested material should be given as follows: "Reprinted (adapted) with permission from (COMPLETE REFERENCE CITATION). Copyright (YEAR) American Chemical Society." Insert appropriate information in place of the capitalized words.
- One-time permission is granted only for the use specified in your request. No additional uses are granted (such as derivative works or other editions). For any other uses, please submit a new request.

If credit is given to another source for the material you requested, permission must be obtained from that source.

BACK

CLOSE WINDOW

Copyright © 2018 [Copyright Clearance Center, Inc.](#) All Rights Reserved. [Privacy statement.](#) [Terms and Conditions.](#)  
Comments? We would like to hear from you. E-mail us at [customercare@copyright.com](mailto:customercare@copyright.com)
